# Supplementary material
Source: publisher figshare collection journal article supplement (https://sage.figshare.com/ndownloader/files/23297015)
Supplement: Supplementary file 1 [file 23297015]

## Sheet: ROW3
location	X(mm)	Y(mm)	Z(mm)	Vx(m/s)	Vy(m/s)	Vz(m/s)	V(m/s)	TI	TKE(m2/s2)
A3	1281.5	600	2026	0.04505	0.05175	0.0345917	0.0768385	0.437811	0.00169755
	1281.5	750	2026	0.0415429	0.0728143	0.00316429	0.0838913	0.420188	0.00186386
	1281.5	900	2026	0.00547143	0.00547143	-0.00547143	0.00947679	0.332149	0.0020888
	1281.5	1050	2026	0.0167595	0.108958	-0.014247	0.111156	0.297925	0.00164502
A2	1431.5	600	2026	0.0978417	-0.10545	-0.153058	0.210047	0.195668	0.00118887
	1431.5	750	2026	0.00547143	0.00547143	-0.00547143	0.00947679	2.84133	0.00108757
	1431.5	900	2026	0.0278084	0.195379	0.0725155	0.210249	0.14954	0.00148278
	1431.5	1050	2026	-0.000778016	0.200478	0.0707138	0.212585	0.146247	0.00144987
A1	1581.5	600	2026	-0.03365	-0.060275	-0.0323917	0.0762536	0.239025	0.000498311
	1581.5	750	2026	0.00547143	-0.0383286	-0.000414286	0.0387193	0.58848	0.000778771
	1581.5	900	2026	-0.00657868	-0.0103759	-0.0211718	0.0244782	1.0716	0.00103208
	1581.5	1050	2026	-0.0282156	-0.00643112	-0.0147466	0.0324798	0.83459	0.00110221
B3	799.5	600	2026	0.178693	0.0296836	0.0258118	0.182971	0.247954	0.00308745
	799.5	750	2026	0.142206	-0.0265695	0.0322315	0.148214	0.308246	0.00313089
	799.5	900	2026	0.0805139	-0.049379	0.0156317	0.0957347	0.514972	0.00364584
	799.5	1050	2026	0.0529317	0.00908384	-0.00563021	0.0539998	0.585473	0.00364584
	799.5	1200	2026	-0.0427266	-0.0108208	0.0159243	0.0468641	0.872053	0.0033263
	799.5	1350	2026	-0.259309	-0.0293172	0.0244546	0.262104	0.370146	0.0141184
	799.5	1500	2026	-0.422773	0.00487927	0.0659617	0.427915	0.202587	0.0112728
B2	949.5	600	2026	0.12841	0.128485	0.0786511	0.197948	0.203255	0.00242815
	949.5	750	2026	0.125828	0.12413	0.0823314	0.194986	0.192103	0.00210458
	949.5	900	2026	0.0660528	0.103669	0.0625981	0.137945	0.31672	0.00286319
	949.5	1050	2026	0.035236	0.115597	0.0777124	0.143678	0.242112	0.00181512
	949.5	1200	2026	0.00668094	0.121356	0.0640328	0.137376	0.31097	0.00273747
	949.5	1350	2026	-0.289384	0.0809992	0.0883347	0.31322	0.372652	0.020436
	949.5	1500	2026	-0.356661	0.116561	0.18791	0.419647	0.26699	0.0188301
B1	1099.5	600	2026	0.047577	-0.0328226	-0.0371524	0.068711	0.510826	0.00184795
	1099.5	750	2026	0.0807494	0.0104496	-0.0550042	0.0982604	0.39022	0.0022053
	1099.5	900	2026	0.0407423	0.0206995	-0.0867452	0.0980466	0.398319	0.0022878
	1099.5	1050	2026	0.00755136	0.0159578	-0.0687229	0.0709543	0.445015	0.00149554
	1099.5	1200	2026	-0.00523911	0.0189293	-0.064561	0.0674825	0.512568	0.00179464
	1099.5	1350	2026	-0.378435	-0.0539967	-0.0764613	0.389839	0.418288	0.0398854
	1099.5	1500	2026	-0.126112	-0.00323064	0.0745129	0.146515	1.12107	0.0404688
C3	317.5	600	2026	0.0790221	-0.0633619	0.0529622	0.114299	0.452324	0.00400935
	317.5	750	2026	0.0665612	-0.0943547	0.0558285	0.128258	0.411816	0.00418469
	317.5	900	2026	-0.00498216	-0.110857	0.0201285	0.112779	0.462506	0.00408117
	317.5	1050	2026	-0.07196	-0.0848029	0.0611216	0.126908	0.410176	0.00406452
	317.5	1200	2026	-0.164488	-0.112806	0.0641132	0.209504	0.303235	0.00605389
	317.5	1350	2026	-0.292437	-0.113875	0.0575629	0.319062	0.208237	0.00662153
	317.5	1500	2026	-0.22398	-0.0197585	0.05403	0.23125	0.22794	0.00525525
C2	467.5	600	2026	0.13404	0.0410707	0.131413	0.192153	0.230857	0.00295171
	467.5	750	2026	0.104804	0.00168193	0.100733	0.145375	0.322165	0.00329024
	467.5	900	2026	0.0286795	-0.0125482	0.103976	0.108586	0.416373	0.00306622
	467.5	1050	2026	-0.0216768	0.00352582	0.109645	0.111822	0.440543	0.00364021
	467.5	1200	2026	-0.104646	-0.0161199	0.097602	0.144003	0.400605	0.00499191
	467.5	1350	2026	-0.266822	0.00481668	0.0973472	0.284067	0.254191	0.00782082
	467.5	1500	2026	-0.393064	0.0407327	0.13612	0.417956	0.150532	0.00593756
C1	617.5	600	2026	0.148365	-0.0912491	0.0191792	0.175233	0.236683	0.00258022
	617.5	750	2026	0.105529	-0.13587	-0.0188843	0.173071	0.257426	0.00297746
	617.5	900	2026	0.0351249	-0.147766	-0.00867238	0.152131	0.266222	0.00246045
	617.5	1050	2026	-0.000721821	-0.119883	-0.00238201	0.119909	0.326353	0.00229705
	617.5	1200	2026	-0.0613655	-0.131249	-0.026786	0.147341	0.289845	0.0144844
	617.5	1350	2026	-0.310554	-0.131783	-0.0336305	0.33903	0.156914	0.0102056
	617.5	1500	2026	-0.522914	-0.0531307	0.00812656	0.525669	0.150532	0.00593756
AS3	150	200	2026	0.0177556	-0.183799	-0.0372652	0.188377	0.245048	0.00319632
	150	350	2026	0.0693844	-0.192529	-0.0416057	0.208836	0.221662	0.0032143
	150	500	2026	-0.00887781	-0.205262	-0.0203824	0.206462	0.247698	0.00392299
	150	650	2026	-0.0564946	-0.226395	-0.0156037	0.233858	0.259023	0.00550393
	150	800	2026	-0.0997946	-0.245786	0.0143587	0.265661	0.216857	0.00497843
	150	950	2026	-0.137359	-0.261278	0.00984297	0.295348	0.24959	0.00815106
	150	1100	2026	-0.180175	-0.253863	0.0431474	0.314279	0.209278	0.00648888
	150	1250	2026	-0.211706	-0.187416	0.038965	0.285416	0.230634	0.00649973
	150	1400	2026	-0.214056	-0.0825498	0.0188845	0.230198	0.29657	0.00699113
	150	1550	2026	0.0726124	0.0504211	-0.00426124	0.0885043	0.956905	0.0107587
	150	1700	2026	0.0854895	0.124547	0.0221465	0.152679	0.519744	0.00944557
	150	1850	2026	0.0378852	0.133893	0.0237305	0.141158	0.540827	0.0087422
	150	2000	2026	-0.00730793	0.0536352	0.013679	0.0558324	0.818751	0.00313449
AS2	0	200	2026	0.0365669	-0.0592519	0.0425187	0.0815829	0.485284	0.00235116
	0	350	2026	0.0561398	-0.0734942	0.0552829	0.107746	0.401876	0.00281242
	0	500	2026	0.0080133	-0.0532086	0.0715877	0.0895554	0.545473	0.0035795
	0	650	2026	-0.0329475	-0.128293	0.0831141	0.156373	0.361364	0.00478967
	0	800	2026	-0.0504109	-0.107629	0.105636	0.15901	0.317382	0.00382036
	0	950	2026	-0.0998715	-0.133283	0.116181	0.203069	0.288615	0.00515248
	0	1100	2026	-0.183655	-0.151449	0.129101	0.270801	0.210894	0.00489238
	0	1250	2026	-0.219072	-0.286574	0.0172448	0.36113	0.212926	0.00503516
	0	1400	2026	-0.25941	-0.00705976	0.128096	0.289399	0.192658	0.00466294
	0	1550	2026	-0.0865882	0.106631	0.136074	0.193349	0.350806	0.00690095
	0	1700	2026	0.0265047	0.152814	0.105896	0.187799	0.35195	0.00655297
	0	1850	2026	0.0379039	0.139894	0.115845	0.185546	0.297285	0.00456392
	0	2000	2026	0.0398563	0.168314	0.0995815	0.199586	0.545473	0.0035795
AS1	-150	200	2026	0.0361679	-0.195029	-0.0721945	0.211084	0.193211	0.00249498
	-150	350	2026	0.0360233	-0.214734	-0.0612895	0.226196	0.205228	0.00323248
	-150	500	2026	0.0107564	-0.171646	-0.0694098	0.185461	0.224516	0.00223642
	-150	650	2026	-0.00165695	-0.237943	-0.0402831	0.241335	0.220876	0.00426215
	-150	800	2026	-0.0246918	-0.221094	-0.0176069	0.223164	0.223321	0.00372564
	-150	950	2026	-0.0684297	-0.258323	-0.00416845	0.267265	0.201855	0.00436571
	-150	1100	2026	-0.16403	-0.293264	0.0079184	0.336113	0.191206	0.00619539
	-150	1250	2026	-0.211285	-0.0925981	0.144304	0.272102	0.190863	0.00712628
	-150	1400	2026	-0.344789	-0.207498	-0.000430279	0.402411	0.162527	0.00641626
	-150	1550	2026	-0.209836	-0.0976731	-0.00242684	0.231467	0.314855	0.00796691
	-150	1700	2026	-0.00142132	-0.0819507	-0.0478245	0.0948953	0.507846	0.00298176
	-150	1850	2026	0.0132626	-0.0794822	-0.00980661	0.0811757	0.549243	0.00298176
	-150	2000	2026	0.0627858	-0.0333729	-0.0204185	0.0739778	0.705263	0.00408316
D3	-617.5	600	2026	-0.165267	-0.195577	-0.0127128	0.256369	0.227878	0.00511947
	-617.5	750	2026	-0.0583665	-0.233673	-0.0529004	0.246593	0.265905	0.00644924
	-617.5	900	2026	-0.023214	-0.200741	0.0056453	0.202158	0.339052	0.00704702
	-617.5	1050	2026	0.0661313	-0.153212	0.0370664	0.170942	0.365643	0.00586008
	-617.5	1200	2026	0.181706	-0.168323	0.0148537	0.248133	0.319911	0.00945193
	-617.5	1350	2026	0.278808	-0.0541756	0.0111563	0.284242	0.291272	0.0102817
	-617.5	1500	2026	0.32748	0.0138625	0.06721	0.334593	0.211628	0.00752092
D2	-467.5	600	2026	-0.120414	-0.269507	-0.154916	0.333365	0.161405	0.00434275
	-467.5	750	2026	-0.0772112	-0.151235	0.0148446	0.170452	0.395465	0.00681574
	-467.5	900	2026	-0.0827727	-0.346769	-0.0964363	0.369324	0.199784	0.00816633
	-467.5	1050	2026	0.0935332	-0.113669	0.0351892	0.151352	0.436368	0.00654291
	-467.5	1200	2026	0.0247537	-0.22646	-0.0113919	0.228093	0.297581	0.00691079
	-467.5	1350	2026	0.187723	0.0532477	0.0739686	0.208678	0.325935	0.00693918
	-467.5	1500	2026	0.235285	0.0909375	0.113935	0.276785	0.189268	0.00411653
D1	-317.5	600	2026	-0.150684	-0.0838504	0.0377168	0.17652	0.31715	0.00470118
	-317.5	750	2026	-0.091012	-0.293259	-0.13361	0.334866	0.215165	0.00778711
	-317.5	900	2026	-0.0234804	-0.18244	0.00603664	0.184043	0.452992	0.0104259
	-317.5	1050	2026	0.0380228	-0.274989	-0.0415346	0.280696	0.29172	0.0100576
	-317.5	1200	2026	0.163961	-0.0388437	0.0571877	0.17794	0.52991	0.0133365
	-317.5	1350	2026	0.0359672	-0.112056	-0.0238401	0.120077	0.670918	0.0097353
	-317.5	1500	2026	-0.0204875	0.0526475	-0.173425	0.182394	0.325697	0.0052935
E3	-1099.5	600	2026	-0.0578413	0.040436	-0.0229092	0.0741992	0.515568	0.00219514
	-1099.5	750	2026	0.0117485	0.0316903	-0.00603664	0.0343328	0.84759	0.00127023
	-1099.5	900	2026	0.0230308	0.0596836	-0.0103247	0.0648008	0.485847	0.0014868
	-1099.5	1050	2026	0.0389191	0.080048	-0.0214652	0.0915595	0.385172	0.00186556
	-1099.5	1200	2026	0.0843047	0.0674438	-0.00874271	0.108316	0.408272	0.00293345
	-1099.5	1350	2026	0.558153	-0.0995298	-0.0533333	0.56946	0.278069	0.0376117
	-1099.5	1500	2026	0.0349026	0.00742591	0.0182134	0.0400633	2.73423	0.0179992
E2	-949.5	600	2026	-0.0349678	0.0662473	0.0929092	0.119346	0.304089	0.00197565
	-949.5	750	2026	0.0294338	0.0748793	0.0862614	0.117959	0.21755	0.000987802
	-949.5	900	2026	0.0265279	0.088801	0.0782681	0.121306	0.200484	0.00088719
	-949.5	1050	2026	0.0599119	0.121353	0.10478	0.171157	0.136548	0.000819318
	-949.5	1200	2026	0.146103	0.0738218	0.0969359	0.190243	0.359226	0.00700558
	-949.5	1350	2026	0.454299	0.0365995	0.0516373	0.458687	0.250611	0.0198209
	-949.5	1500	2026	0.133802	-0.103065	0.0221423	0.17034	0.503069	0.0110149
E1	-799.5	600	2026	-0.129936	-0.162752	-0.0356326	0.211285	0.276159	0.00510674
	-799.5	750	2026	-0.0319484	-0.122323	-0.0342215	0.130976	0.337558	0.00293205
	-799.5	900	2026	-0.00525396	-0.0836303	-0.0390841	0.0924619	0.423999	0.00230541
	-799.5	1050	2026	0.0544836	-0.119672	0.0192074	0.132886	0.374026	0.00370556
	-799.5	1200	2026	0.211774	-0.176395	0.0189925	0.276268	0.317183	0.0115179
	-799.5	1350	2026	0.332729	-0.130621	-0.0493787	0.360844	0.276052	0.0148838
	-799.5	1500	2026	0.134022	0.0689077	0.154132	0.215562	0.333641	0.00775878
F3	-1581.5	600	2026	0.069586	0.0160029	-0.0130906	0.0725925	0.426464	0.0014376
	-1581.5	750	2026	0.0360671	0.0577873	0.0131192	0.0693709	0.418551	0.00126457
	-1581.5	900	2026	0.0231	0.0507167	0.0121	0.0570281	0.555737	0.00150663
	-1581.5	1050	2026	0.0328393	0.0591674	0.0773439	0.102768	0.329183	0.00171665
F2	-1431.5	600	2026	0.0302498	0.0793933	0.0867666	0.121436	0.24474	0.00132495
	-1431.5	750	2026	0.0197074	0.18823	0.0561527	0.197413	0.19071	0.00212614
	-1431.5	900	2026	0.00434167	0.0344417	-0.0627083	0.0716758	0.479428	0.00177126
	-1431.5	1050	2026	0.0543262	0.0828652	-0.0865932	0.131592	0.259689	0.00175168
F1	-1281.5	600	2026	-0.110471	0.02596	-0.040257	0.120409	0.368924	0.00295996
	-1281.5	750	2026	-0.0504568	0.0305567	-0.096788	0.113347	0.349151	0.0023493
	-1281.5	900	2026	0.049325	0.204192	0.0514417	0.216272	0.145219	0.00147957
	-1281.5	1050	2026	0.0596788	0.175882	0.0570403	0.194292	0.218517	0.00270379

## Sheet: ROW4
location	X(mm)	Y(mm)	Z(mm)	Vx(m/s)	Vy(m/s)	Vz(m/s)	V(m/s)	TI	TKE(m2/s2)
A3	1281.5	600	2811	0.049971	0.0183152	0.0315977	0.0618947	0.901958	0.00467488
	1281.5	750	2811	0.0986171	0.109233	0.0141807	0.147845	0.331149	0.00359544
	1281.5	900	2811	0.108702	0.149489	-0.00571189	0.184921	0.271368	0.00377728
	1281.5	1050	2811	0.00319734	0.0803247	0.014055	0.0816078	0.475835	0.00226187
A2	1431.5	600	2811	-0.00087146	0.109877	0.0995933	0.148298	0.216486	0.00154606
	1431.5	750	2811	0.00245404	0.168489	0.0765707	0.185088	0.200048	0.00205646
	1431.5	900	2811	0.0365494	0.221876	0.0830318	0.239706	0.180152	0.00279722
	1431.5	1050	2811	0.00945046	0.215828	0.0731724	0.228091	0.163107	0.00207613
A1	1581.5	600	2811	-0.0463326	-0.045541	-0.0501816	0.0820907	0.297324	0.000893593
	1581.5	750	2811	-0.0103118	-0.00557154	-0.035004	0.0369141	0.908798	0.00168815
	1581.5	900	2811	-0.011273	0.0383501	-0.0354606	0.0534347	0.59081	0.00149497
	1581.5	1050	2811	-0.0358701	0.0544047	-0.0325562	0.0728453	0.471017	0.00176591
B3	799.5	600	2811	0.220324	-0.0865289	-0.00607895	0.236784	0.256544	0.00553503
	799.5	750	2811	0.110742	-0.0714921	-0.0461184	0.139649	0.478229	0.0066902
	799.5	900	2811	0.0277611	-0.0119694	-0.1202	0.123943	0.470447	0.00509987
	799.5	1050	2811	-0.0437238	-0.0444048	-0.0817976	0.102832	0.701658	0.00780904
	799.5	1200	2811	-0.302808	-0.105063	-0.00267895	0.320528	0.312153	0.0150161
	799.5	1350	2811	-0.406842	-0.0956526	-0.0279921	0.418872	0.247638	0.0161395
	799.5	1500	2811	-0.2688	-0.0177098	-0.0748685	0.279593	0.287739	0.00970825
B2	949.5	600	2811	0.217734	0.0689211	0.0814132	0.242459	0.225443	0.00448167
	949.5	750	2811	0.0828737	0.0679421	0.0864974	0.137717	0.371137	0.00391863
	949.5	900	2811	0.0506972	0.0798833	0.0101167	0.095152	0.513809	0.00358534
	949.5	1050	2811	0.0386929	0.0687024	-0.00408571	0.0789547	0.685721	0.00439686
	949.5	1200	2811	-0.224884	0.000347368	0.06645	0.234497	0.444734	0.0163142
	949.5	1350	2811	-0.460421	-0.00193421	0.0465447	0.462772	0.280741	0.0253184
	949.5	1500	2811	-0.204317	0.0616888	0.0387597	0.216918	0.422876	0.0126214
B1	1099.5	600	2811	0.2183	-0.0357368	-0.04845	0.22645	0.230813	0.00409785
	1099.5	750	2811	0.0636211	-0.05735	-0.0312816	0.0911877	0.484377	0.00292638
	1099.5	900	2811	0.0298444	-0.0635917	-0.0550778	0.0892645	0.464005	0.00257332
	1099.5	1050	2811	0.0438643	-0.0432857	-0.0939095	0.112324	0.441283	0.00368529
	1099.5	1200	2811	-0.122371	-0.0891711	-0.0915342	0.176931	0.529631	0.0131719
	1099.5	1350	2811	-0.613932	-0.172563	-0.117479	0.648453	0.282776	0.050435
	1099.5	1500	2811	-0.129847	-0.105209	0.0458281	0.17329	0.749551	0.0253071
C3	317.5	600	2811	0.08523	-0.154095	-0.07847	0.192787	0.386652	0.00833468
	317.5	750	2811	0.0583801	-0.215633	-0.0591237	0.231088	0.395253	0.012514
	317.5	900	2811	-0.0561478	-0.227002	-0.0502681	0.239184	0.396381	0.0134829
	317.5	1050	2811	-0.194203	-0.222629	-0.0317263	0.297128	0.319598	0.0135265
	317.5	1200	2811	-0.297682	-0.1552	-0.0295263	0.337006	0.234665	0.00938134
	317.5	1350	2811	-0.334255	-0.0906675	-0.0682075	0.352986	0.239927	0.0107589
	317.5	1500	2811	-0.250639	-0.0229526	-0.0333895	0.253893	0.334381	0.0108113
C2	467.5	600	2811	0.14347	-0.043405	0.0358125	0.154111	0.388453	0.00537569
	467.5	750	2811	0.104845	-0.10493	0.029657	0.151269	0.483512	0.00802424
	467.5	900	2811	0.0268168	-0.214191	-0.104578	0.239861	0.613672	0.0103138
	467.5	1050	2811	-0.157203	-0.13145	0.0456184	0.209935	0.427354	0.0120736
	467.5	1200	2811	-0.313382	-0.0777947	0.0732842	0.331105	0.227594	0.00851815
	467.5	1350	2811	-0.360165	-0.0145575	0.0312725	0.361813	0.207492	0.00845398
	467.5	1500	2811	-0.29035	0.0649158	0.0167789	0.297991	0.280499	0.01048
C1	617.5	600	2811	0.193757	-0.190942	-0.05719	0.277978	0.21876	0.00554685
	617.5	750	2811	0.128961	-0.268548	-0.0790536	0.308218	0.241169	0.008288
	617.5	900	2811	-0.0101275	-0.13153	0.0292452	0.135123	0.327076	0.00923225
	617.5	1050	2811	-0.117239	-0.211234	-0.0779579	0.253855	0.347334	0.0116616
	617.5	1200	2811	-0.364797	-0.223666	-0.0564026	0.431607	0.225509	0.0142101
	617.5	1350	2811	-0.433387	-0.17302	-0.0907825	0.475397	0.199836	0.0135379
	617.5	1500	2811	-0.360305	-0.0757105	-0.151726	0.398212	0.207755	0.0102665
AS3	150	200	2811	-0.0381599	-0.0857452	0.0492506	0.105991	0.494889	0.00412707
	150	350	2811	0.018751	-0.173697	0.0667444	0.187021	0.26954	0.00381171
	150	500	2811	0.0105912	-0.170633	0.0798168	0.188676	0.31328	0.00524068
	150	650	2811	0.00631973	-0.156137	0.0772773	0.174328	0.366101	0.00610983
	150	800	2811	-0.0236553	-0.205562	0.0836969	0.223205	0.340848	0.00868204
	150	950	2811	0.0156786	-0.260858	0.0674188	0.269885	0.281156	0.00863661
	150	1100	2811	0.0483369	-0.256681	0.0745111	0.271613	0.371291	0.0152553
	150	1250	2811	0.147311	-0.220258	0.0518818	0.270011	0.284714	0.00886484
	150	1400	2811	0.167934	-0.145378	0.0617846	0.230551	0.342876	0.00937349
	150	1550	2811	0.224017	-0.036375	0.008625	0.227115	0.353737	0.00968146
	150	1700	2811	0.0246315	0.0687102	0.0332496	0.0802081	0.946989	0.00865401
	150	1850	2811	-0.0198585	0.0176603	0.020383	0.033492	1.62055	0.00441875
	150	2000	2811	-0.0323055	0.0238687	0.0385439	0.0556686	0.891414	0.00369377
AS2	0	200	2811	-0.230092	-0.0889199	0.0285696	0.248325	0.590327	0.00449266
	0	350	2811	0.0127311	-0.27806	-0.07194	0.287497	0.440675	0.00453307
	0	500	2811	0.024438	-0.0699917	0.113997	0.135983	0.482363	0.00645367
	0	650	2811	0.0239467	-0.0909242	0.0992256	0.136698	0.503273	0.00709944
	0	800	2811	0.0357702	-0.113239	0.110241	0.162036	0.442396	0.00770793
	0	950	2811	0.0632473	-0.168468	0.129875	0.221922	0.338601	0.00846966
	0	1100	2811	0.0348251	-0.16237	0.11616	0.202657	0.477894	0.0140695
	0	1250	2811	-0.00878435	-0.302256	-0.0345962	0.304357	0.441856	0.0134696
	0	1400	2811	-0.125932	-0.196945	-0.0435209	0.237783	0.587764	0.0132398
	0	1550	2811	0.117083	0.110375	0.105808	0.192579	0.380994	0.00807502
	0	1700	2811	-0.0371106	0.149288	0.0974456	0.182098	0.457083	0.0103918
	0	1850	2811	0.00041632	0.13766	0.0931724	0.166228	0.315827	0.00413424
	0	2000	2811	0.0224839	-0.0611706	-0.0248394	0.069745	0.271466	0.00218127
AS1	-150	200	2811	-0.236418	0.0526606	0.146276	0.282954	0.227683	0.00475302
	-150	350	2811	0.0267694	-0.0619151	0.104938	0.124748	0.197297	0.00482616
	-150	500	2811	0.0150541	-0.269817	-0.081249	0.282186	0.259656	0.00805301
	-150	650	2811	0.0467777	-0.26617	-0.0664946	0.278309	0.275008	0.00878692
	-150	800	2811	0.0831724	-0.277627	-0.0580849	0.295581	0.294643	0.0113773
	-150	950	2811	0.090841	-0.312839	-0.067219	0.332624	0.260592	0.0112699
	-150	1100	2811	-0.000335475	-0.35561	-0.088137	0.36637	0.271055	0.0147926
	-150	1250	2811	0.094438	-0.106386	0.160491	0.214462	0.349004	0.0169246
	-150	1400	2811	0.0362219	-0.0243891	0.153762	0.159842	0.45115	0.0172621
	-150	1550	2811	-0.0934417	-0.0889	-0.020325	0.130567	0.787044	0.0158399
	-150	1700	2811	-0.100838	-0.0210134	-0.055134	0.116831	0.636415	0.00829259
	-150	1850	2811	0.00978351	-0.0375687	-0.0430308	0.0579549	1.00556	0.00509436
	-150	2000	2811	0.0052748	0.097666	0.100828	0.140473	0.578209	0.00243942
D3	-617.5	600	2811	-0.185018	-0.132514	0.115366	0.255149	0.232357	0.00527216
	-617.5	750	2811	-0.150381	-0.0929993	0.0915075	0.19909	0.213214	0.00270284
	-617.5	900	2811	-0.0767237	-0.293171	0.0734684	0.311823	0.292166	0.00874325
	-617.5	1050	2811	0.03823	-0.17387	0.0348975	0.181412	0.41917	0.00867364
	-617.5	1200	2811	0.160721	-0.148238	0.0164762	0.219266	0.365407	0.00962909
	-617.5	1350	2811	0.32079	-0.0831595	-0.00511905	0.331434	0.275302	0.0124883
	-617.5	1500	2811	0.419224	-5.73566e-05	0.01698	0.419568	0.18182	0.0087293
D2	-467.5	600	2811	-0.113245	-0.0610636	0.162682	0.207409	0.312327	0.00629459
	-467.5	750	2811	-0.140341	-0.0436282	0.170058	0.224764	0.21748	0.00358411
	-467.5	900	2811	-0.0774684	-0.128979	0.186337	0.239496	0.316113	0.0085975
	-467.5	1050	2811	0.0543325	-0.11311	0.14282	0.190114	0.434432	0.0102321
	-467.5	1200	2811	0.170681	-0.0821357	0.127462	0.228309	0.341349	0.00911032
	-467.5	1350	2811	0.258483	0.00241905	0.101264	0.277622	0.253517	0.00743042
	-467.5	1500	2811	0.304292	0.0643791	0.100057	0.326726	0.199928	0.0064004
D1	-317.5	600	2811	-0.0325386	-0.201875	0.0237477	0.205855	0.347994	0.00769765
	-317.5	750	2811	-0.13246	-0.232467	0.0444232	0.27122	0.205618	0.00466504
	-317.5	900	2811	-0.0767237	-0.293171	0.0734684	0.311823	0.276702	0.0111669
	-317.5	1050	2811	0.0388375	-0.277367	0.0827675	0.292047	0.285333	0.010416
	-317.5	1200	2811	0.147252	-0.249762	0.052481	0.29465	0.255811	0.00852199
	-317.5	1350	2811	0.211702	-0.172357	0.0113595	0.273229	0.23985	0.00644203
	-317.5	1500	2811	0.180863	-0.0758105	-0.0166334	0.196813	0.331119	0.00637041
E3	-1099.5	600	2811	-0.213837	-0.0145121	0.0650542	0.223984	0.211657	0.00336093
	-1099.5	750	2811	-0.15081	-0.0261967	0.0634133	0.165684	0.542206	0.00206068
	-1099.5	900	2811	-0.0511152	-0.00825652	0.0282804	0.0589976	0.693172	0.00250866
	-1099.5	1050	2811	0.0176838	-0.0335074	0.0076701	0.0386561	0.597434	0.000974024
	-1099.5	1200	2811	0.0144949	0.0142551	-0.0468939	0.0511112	0.341271	0.00986103
	-1099.5	1350	2811	0.292933	-0.0291958	-0.0495833	0.298531	0.257054	0.0157449
	-1099.5	1500	2811	0.102342	0.035986	0.003088	0.108528	0.306077	0.010851
E2	-949.5	600	2811	-0.236418	0.0526606	0.146276	0.282954	0.166978	0.00302251
	-949.5	750	2811	-0.175957	0.02172	0.15297	0.234163	0.318105	0.00290327
	-949.5	900	2811	-0.0885913	0.0461761	0.127722	0.162153	0.300219	0.00355482
	-949.5	1050	2811	0.0130515	0.0482405	0.0951249	0.107453	0.27782	0.00147625
	-949.5	1200	2811	0.0711183	0.0315657	0.0555429	0.0955993	0.450425	0.00549185
	-949.5	1350	2811	0.364067	0.0069375	0.0653708	0.369954	0.325052	0.0216917
	-949.5	1500	2811	0.25011	0.085502	0.097178	0.281619	0.41818	0.0208038
E1	-799.5	600	2811	-0.230092	-0.0889199	0.0285696	0.248325	0.203854	0.00433116
	-799.5	750	2811	-0.189087	-0.18192	0.0284267	0.263926	0.254024	0.00605155
	-799.5	900	2811	-0.117889	-0.140972	0.0123978	0.184186	0.325957	0.00540664
	-799.5	1050	2811	-0.00942955	-0.140655	-0.00675143	0.141133	0.273281	0.00521651
	-799.5	1200	2811	0.124044	-0.168415	-0.0416829	0.213279	0.341271	0.00986103
	-799.5	1350	2811	0.35185	-0.180337	-0.0503417	0.398565	0.257054	0.0157449
	-799.5	1500	2811	0.254796	-0.108432	-0.02322	0.277881	0.306077	0.010851
F3	-1581.5	600	2811	-0.0513489	0.0215071	0.0357119	0.0661408	0.620413	0.00252576
	-1581.5	750	2811	-0.0643112	0.0760742	-0.0250892	0.102726	0.486994	0.00375406
	-1581.5	900	2811	-0.0317131	0.110992	-0.0216345	0.117444	0.388009	0.00311483
	-1581.5	1050	2811	0.0168867	0.121772	-0.0176255	0.124194	0.29719	0.00204344
F2	-1431.5	600	2811	-0.110533	0.119958	0.100716	0.191706	0.262026	0.00378487
	-1431.5	750	2811	-0.126146	0.186802	0.0346467	0.228053	0.219352	0.00375358
	-1431.5	900	2811	-0.0785368	0.217216	0.0513205	0.236611	0.195557	0.00321151
	-1431.5	1050	2811	-0.0102511	0.173608	0.0646413	0.185536	0.194067	0.00194469
F1	-1281.5	600	2811	-0.21542	-0.0479434	-0.0507327	0.226447	0.281884	0.00611176
	-1281.5	750	2811	-0.17449	0.00868665	-0.0749465	0.190103	0.260689	#REF!
	-1281.5	900	2811	-0.0998501	0.0170735	-0.0753605	0.126257	0.311476	0.00231979
	-1281.5	1050	2811	-0.0455739	0.00106887	-0.0638594	0.0784611	0.516618	0.00246456

## Sheet: ROW5
location	X(mm)	Y(mm)	Z(mm)	Vx(m/s)	Vy(m/s)	Vz(m/s)	V(m/s)	TI	TKE(m2/s2)
A3	1281.5	600	3596	0.00587011	0.0653372	0.0296753	0.0720002	0.437811	0.00169755
	1281.5	750	3596	0.0489509	0.115504	-0.00857619	0.125741	0.380322	0.00343044
	1281.5	900	3596	0.0168184	0.142837	0.00568573	0.143936	0.337845	0.000498311
	1281.5	1050	3596	0.0037228	0.164359	0.000153102	0.164402	0.270796	0.00297295
A2	1431.5	600	3596	0.00666112	0.109217	0.126644	0.167367	0.195668	0.00118887
	1431.5	750	3596	-0.0322648	0.171699	0.0775021	0.191123	0.211242	0.002445
	1431.5	900	3596	-0.024342	0.211677	0.0869017	0.230112	0.177072	0.0024904
	1431.5	1050	3596	-0.0289766	0.193699	0.062216	0.205498	0.207966	0.00273965
A1	1581.5	600	3596	-0.0393922	-0.0456786	-0.0652789	0.0888798	0.239025	0.000498311
	1581.5	750	3596	-0.0462281	-0.0352123	-0.111507	0.125741	0.295513	0.00207108
	1581.5	900	3596	-0.0464964	-0.0173015	-0.0990006	0.110736	0.292506	0.00157374
	1581.5	1050	3596	-0.0426753	-0.0248106	-0.0426914	0.0652633	0.508701	0.00165331
B3	799.5	600	3596	0.226102	0.0063875	-0.042505	0.230152	0.317616	0.0080154
	799.5	750	3596	0.12108	-0.035985	0.0196439	0.127832	0.498927	0.00610164
	799.5	900	3596	0.0282083	-0.0447	-0.0976833	0.111067	0.701877	0.00911552
	799.5	1050	3596	-0.090275	-0.119525	-0.111183	0.186541	0.531072	0.0147213
	799.5	1200	3596	-0.327918	-0.1374	-0.0482035	0.358793	0.307306	0.0182356
	799.5	1350	3596	-0.368561	-0.0765111	-0.0320139	0.377778	0.311923	0.0208286
	799.5	1500	3596	-0.216189	-0.0202667	-0.0793361	0.231177	0.42244	0.0143057
B2	949.5	600	3596	0.21302	0.103292	0.0285925	0.238463	0.282225	0.00679396
	949.5	750	3596	0.114246	0.112454	0.0864496	0.182131	0.289049	0.0041572
	949.5	900	3596	0.0487722	0.0959861	0.0251833	0.110572	0.566157	0.0058784
	949.5	1050	3596	0.00173056	0.056775	-0.00802778	0.0573658	1.427	0.0100518
	949.5	1200	3596	-0.23777	-0.0180033	0.0451207	0.242682	0.455695	0.0183449
	949.5	1350	3596	-0.436928	0.0192306	0.04135	0.439301	0.342627	0.0339828
	949.5	1500	3596	-0.0767583	0.0492222	0.0399722	0.0995613	1.01605	0.0153499
B1	1099.5	600	3596	0.152147	-0.0336425	-0.0797125	0.175028	0.422057	0.00818555
	1099.5	750	3596	0.127666	0.0111686	-0.0662131	0.144248	0.38203	0.00455518
	1099.5	900	3596	0.0431306	0.00663056	-0.0649111	0.0782155	0.686072	0.00431932
	1099.5	1050	3596	0.00938889	0.0367	-0.0976028	0.104696	0.487143	0.00390182
	1099.5	1200	3596	-0.0866813	-0.0239797	-0.109696	0.141851	0.54081	0.00882769
	1099.5	1350	3596	-0.610114	-0.230322	-0.101306	0.659962	0.332811	0.0723645
	1099.5	1500	3596	0.0765444	-0.130608	-0.0413	0.156918	0.628918	0.0146092
C3	317.5	600	3596	0.0411583	-0.0737583	-0.0975056	0.129002	0.506169	0.00639556
	317.5	750	3596	0.103878	-0.10995	-0.00893056	0.151523	0.534457	0.00983733
	317.5	900	3596	0.0162781	-0.167972	-0.0232231	0.170349	0.556025	0.0134574
	317.5	1050	3596	-0.0775669	-0.180111	-0.0260665	0.197828	0.472694	0.0131168
	317.5	1200	3596	-0.227098	-0.136556	0.000501068	0.264993	0.366507	0.014149
	317.5	1350	3596	-0.298567	-0.0671389	-0.0525667	0.310504	0.326769	0.0154422
	317.5	1500	3596	-0.317047	0.0240167	-0.106019	0.335165	0.309196	0.0161093
C2	467.5	600	3596	0.154203	0.00188889	0.0375083	0.15871	0.374429	0.00529711
	467.5	750	3596	0.170169	-0.0461222	0.0962889	0.200889	0.380489	0.00876373
	467.5	900	3596	0.0715087	-0.135012	-0.00177874	0.15279	0.564217	0.0111474
	467.5	1050	3596	-0.0438758	-0.135078	-0.0280979	0.144778	0.611647	0.0117625
	467.5	1200	3596	-0.233974	-0.0584814	0.0538391	0.247108	0.332032	0.0100978
	467.5	1350	3596	-0.310992	0.0273917	0.0230833	0.313048	0.274906	0.0111092
	467.5	1500	3596	-0.342161	0.105461	-0.0350611	0.359758	0.25653	0.0127758
C1	617.5	600	3596	0.223725	-0.107956	-0.0673139	0.257368	0.265014	0.00697813
	617.5	750	3596	0.213322	-0.268483	0.00276667	0.342925	0.259028	0.0118354
	617.5	900	3596	0.0564973	-0.226303	-0.139437	0.271749	0.345999	0.013261
	617.5	1050	3596	-0.0553186	-0.175256	-0.140443	0.231299	0.365302	0.0107089
	617.5	1200	3596	-0.279538	-0.206479	-0.064935	0.353541	0.299215	0.0167856
	617.5	1350	3596	-0.369014	-0.138047	-0.0937222	0.404984	0.257166	0.0162703
	617.5	1500	3596	-0.361256	-0.0475194	-0.170394	0.402241	0.266838	0.0172806
AS3	150	200	3596	-0.0375021	-0.0997585	0.0548876	0.119878	0.343796	0.00254785
	150	350	3596	-0.009867	-0.132602	0.0505819	0.142264	0.340771	0.0035254
	150	500	3596	-0.015478	-0.111904	0.0297506	0.116821	0.425778	0.00371105
	150	650	3596	-0.0376589	-0.124791	0.0457525	0.138146	#REF!	0.00624912
	150	800	3596	-0.0472232	-0.143465	0.0442198	0.157377	0.46624	0.00807593
	150	950	3596	-0.0228023	-0.114462	0.0483153	0.126317	0.550194	0.00724509
	150	1100	3596	0.0445462	-0.170067	0.0678684	0.188449	0.382006	0.00777359
	150	1250	3596	0.190117	-0.171711	0.0682806	0.265125	0.314501	0.0104288
	150	1400	3596	0.377256	-0.167594	0.0567222	0.416686	0.1924	0.00964088
	150	1550	3596	0.348481	-0.0766083	0.0352972	0.358543	0.256085	0.0126457
	150	1700	3596	0.0542132	0.0296342	0.0429053	0.0752204	0.887643	0.00668712
	150	1850	3596	-0.0701361	0.0172222	0.0402806	0.0826934	0.635844	0.00414701
	150	2000	3596	-0.0682985	0.0386271	0.0511417	0.0936601	0.570251	0.00427891
AS2	0	200	3596	0.218546	0.0107494	-0.00264779	0.218826	0.335259	0.00214746
	0	350	3596	-0.00223608	-0.0519534	0.10783	0.119714	0.410142	0.00361621
	0	500	3596	-0.00907731	-0.059335	0.104239	0.120287	0.424919	0.00391867
	0	650	3596	0.00172241	-0.0623913	0.118871	0.134261	0.453685	0.00556545
	0	800	3596	0.0116275	-0.0829614	0.131233	0.155692	0.473021	0.00813551
	0	950	3596	0.044045	-0.0993078	0.122569	0.163784	0.432484	0.00752614
	0	1100	3596	0.0695337	-0.130508	0.158435	0.216723	0.417353	0.0122718
	0	1250	3596	0.205178	-0.11875	0.171106	0.292364	0.281878	0.0101874
	0	1400	3596	0.314883	-0.0406556	0.149828	0.351074	0.251708	0.0117134
	0	1550	3596	0.155664	0.09485	0.118786	0.217573	0.442839	0.0139249
	0	1700	3596	0.0162447	0.151468	0.0930184	0.178491	0.463717	0.0102761
	0	1850	3596	-0.0640028	0.140114	0.111819	0.190347	0.344713	0.00645798
	0	2000	3596	-0.0372654	0.123598	0.123782	0.178849	0.304409	0.00444612
AS1	-150	200	3596	0.0280849	-0.170966	-0.0374854	0.177266	0.272685	0.00350481
	-150	350	3596	-0.0178803	-0.231239	-0.0428678	0.235857	0.210517	0.00369797
	-150	500	3596	-0.0249127	-0.232145	-0.0379135	0.236536	0.248148	0.00516783
	-150	650	3596	0.0135284	-0.275318	-0.0293395	0.277207	0.246363	0.00699603
	-150	800	3596	0.0464178	-0.269622	-0.00764262	0.273696	0.282509	0.00896793
	-150	950	3596	0.0966555	-0.300417	0.00206005	0.31559	0.263873	0.0104023
	-150	1100	3596	0.0477769	-0.300283	0.0213739	0.30481	0.351169	0.0171864
	-150	1250	3596	0.0839083	-0.2915	0.033225	0.30515	0.353503	0.0174545
	-150	1400	3596	0.115725	-0.174839	-0.00335	0.209695	0.652502	0.0280823
	-150	1550	3596	-0.102211	-0.050475	-0.0565361	0.127245	0.848835	0.0174991
	-150	1700	3596	-0.108653	0.00947105	-0.0679395	0.128495	0.719638	0.0128259
	-150	1850	3596	-0.0803556	-0.0131556	-0.020075	0.0838635	0.800122	0.00675383
	-150	2000	3596	-0.0116012	-0.0579755	-0.00426344	0.0592784	0.911685	0.004381
D3	-617.5	600	3596	-0.186766	0.00359211	0.0232289	0.188239	0.276774	0.00407156
	-617.5	750	3596	-0.170426	0.0139014	0.00482803	0.17106	0.292156	0.00374643
	-617.5	900	3596	-0.112197	0.041088	-0.000745261	0.119486	0.427919	0.00392147
	-617.5	1050	3596	-0.0738656	0.0274372	-0.0203371	0.0813789	0.621182	0.00383312
	-617.5	1200	3596	0.0534659	-0.0281955	-0.0489682	0.0777912	0.954201	0.00826479
	-617.5	1350	3596	0.348997	-0.0806184	-0.0134605	0.358441	0.269995	0.0140487
	-617.5	1500	3596	0.507056	-0.0578528	-0.000732759	0.510346	0.225989	0.0199524
D2	-467.5	600	3596	-0.141929	0.07005	0.114666	0.195446	0.26745	0.00409854
	-467.5	750	3596	-0.130934	0.0762603	0.0797921	0.171249	0.333245	0.00488512
	-467.5	900	3596	-0.0909218	0.107569	0.0662192	0.155637	0.415809	0.00628212
	-467.5	1050	3596	-0.047442	0.109682	0.0548936	0.131507	0.436705	0.0049473
	-467.5	1200	3596	0.09615	0.0422045	0.0507682	0.116634	0.657732	0.00882751
	-467.5	1350	3596	0.340574	-0.02085	0.0937842	0.353865	0.241625	0.010966
	-467.5	1500	3596	0.396196	0.0105556	0.0861718	0.405596	0.235968	0.0137399
D1	-317.5	600	3596	-0.0982158	-0.149179	-0.00563684	0.178697	0.318806	0.00486829
	-317.5	750	3596	-0.100788	-0.122233	-0.0359754	0.16246	0.418755	0.00694234
	-317.5	900	3596	-0.0678006	-0.124524	-0.0432147	0.148225	0.514084	0.00870963
	-317.5	1050	3596	-0.0146211	-0.119689	-0.04448	0.128521	0.525346	0.00683808
	-317.5	1200	3596	0.145545	-0.183243	-0.0397341	0.237361	0.350814	0.0104007
	-317.5	1350	3596	0.37425	-0.250195	0.0136395	0.450385	0.187396	0.0106851
	-317.5	1500	3596	0.295659	-0.153883	-0.00624361	0.333367	0.278218	0.0129034
E3	-1099.5	600	3596	-0.0404534	0.0507541	0.0530113	0.0838013	0.383288	0.00154754
	-1099.5	750	3596	-0.100235	0.140374	-0.0150277	0.173141	0.295821	0.00393503
	-1099.5	900	3596	-0.0948375	0.159645	-0.0217125	0.186955	0.250632	0.00329336
	-1099.5	1050	3596	-0.101905	0.107798	-0.0198976	0.149669	0.329044	0.003638
	-1099.5	1200	3596	-0.0637722	0.104978	-0.0348139	0.127668	0.349721	0.00299021
	-1099.5	1350	3596	0.0374306	0.0485778	-0.0714472	0.0941571	0.879645	0.0102899
	-1099.5	1500	3596	0.566997	0.100701	0.0357742	0.57698	0.378588	0.0715727
E2	-949.5	600	3596	-0.0663085	0.152351	0.10398	0.196009	0.194103	0.00217124
	-949.5	750	3596	-0.108878	0.239543	0.0516482	0.268147	0.211053	0.00480417
	-949.5	900	3596	-0.120532	0.242637	0.045105	0.274655	0.190862	0.00412197
	-949.5	1050	3596	-0.0826833	0.160398	0.0598357	0.190116	0.242228	0.00318111
	-949.5	1200	3596	-0.0391	0.153983	0.0340278	0.162473	0.269546	0.00287688
	-949.5	1350	3596	0.136872	0.0860083	0.0405667	0.166665	0.596416	0.014821
	-949.5	1500	3596	0.50696	0.0785688	0.101225	0.522904	0.251254	0.0258918
E1	-799.5	600	3596	-0.126848	-0.026831	-0.0358847	0.134529	0.36075	0.00353295
	-799.5	750	3596	-0.102452	0.0381163	-0.104321	0.151103	0.358671	0.00440586
	-799.5	900	3596	-0.112347	0.02786	-0.0977725	0.151518	0.337352	0.00391909
	-799.5	1050	3596	-0.0820976	-0.0129643	-0.0564524	0.100474	0.556293	0.00468601
	-799.5	1200	3596	-0.0324139	-0.0362139	-0.103836	0.114647	0.443618	0.00388005
	-799.5	1350	3596	0.198817	-0.0995056	-0.123397	0.254276	0.429154	0.0178619
	-799.5	1500	3596	0.490203	-0.106455	-0.0360297	0.502922	#REF!	0.0172423
F3	-1581.5	600	3596	0.0164	0.00200526	0.0296342	0.0339289	0.561254	0.000543937
	-1581.5	750	3596	-0.0267306	0.0333222	0.025825	0.0499182	0.519282	0.00100789
	-1581.5	900	3596	-0.00320278	0.0525167	0.0142167	0.0545011	0.463864	0.000958701
	-1581.5	1050	3596	0.0146806	0.0542639	0.0139	0.0579077	0.463672	0.0010814
F2	-1431.5	600	3596	0.0157921	0.0996816	0.132584	0.166626	0.122644	0.000626431
	-1431.5	750	3596	-0.00715278	0.134667	0.101889	0.16902	0.137601	0.000811349
	-1431.5	900	3596	0.0112528	0.164833	0.0949028	0.190534	0.141445	0.00108946
	-1431.5	1050	3596	0.0246306	0.159233	0.0917611	0.185424	0.160552	0.00132939
F1	-1281.5	600	3596	-0.00445263	-0.00359211	0.00640789	0.00859013	4.39223	0.0021353
	-1281.5	750	3596	-0.0426806	-0.00528611	-0.0225889	0.0485781	0.76766	0.00208598
	-1281.5	900	3596	-0.0484361	0.0280833	-0.0319472	0.064462	0.592413	0.0021875
	-1281.5	1050	3596	-0.0465972	0.0447083	-0.0426306	0.0773789	0.575676	0.0021353
